# Supplementary material for: Construction of an advanced Co-doped V2O3 electrode material with significantly enhanced conductivity and structural stability for supercapacitors using asparagic acid-functionalized graphene quantum dots
Source: Royal Society of Chemistry journal article supplement (doi:10.1039/d4nj03089c), 2024-01-01
Supplement: d4nj03089c1.pdf [file d4nj03089c1.pdf]

## Electronic Supporting Information (ESI)

### Construction of an advanced Co-doped V<sub>2</sub>O<sub>3</sub> electrode material with significantly enhanced conductivity and structural stability for supercapacitors using asparagic acid-functionalized graphene quantum dot

Li Ruiyi,<sup>a</sup> Yang Chen,<sup>a</sup> Li Zaijun\*<sup>a</sup> and Gao Mingjie\*<sup>b</sup>

<sup>a</sup> Key Laboratory of Synthetic and Biological Colloids, Ministry of Education, School of Chemical and Material Engineering, School of Life Science and Health Engineering, Jiangnan University, Wuxi 214122, China.

<sup>b</sup> Weifang People's Hospital, Shandong Second Medical University, Shandong 261041, China

#### 1. Experimental

##### 1.1. Electrochemical measurements

Cyclic voltammogram (CV), electrochemical impedance spectroscopy (EIS) and galvanostatic charge/discharge curves of three-electrode testing system and flexible supercapacitor were measured on the CHI 660D electrochemical workstation. The potential amplitude of ±5 mV and frequency of 0.01-10<sup>5</sup> Hz were adopted in the EIS measurements.

For the three-electrode system, the specific capacitance ( $C_g$ , based on a single electrode) were calculated according to the equation (1):

$$C_g = \frac{It}{m\Delta V} \quad (1)$$

Where,  $C_g$  is the gravimetric capacitance (F g<sup>-1</sup>),  $I$  is the current (A),  $m$  is the active mass on the electrode (g),  $\Delta V$  is the potential range, and  $t$  is the discharging time.

For the symmetric supercapacitor, the specific capacitance ( $C_{g2}$ ), energy density and power density were calculated according to the equations (2, 3 and 4):

$$C_{g2} = \frac{2It}{m\Delta V} \quad (2)$$

$$E_g = \frac{C_{g2}\Delta V^2}{8 \times 3600} \quad (3)$$

$$P_g = \frac{E_{g2} \times 3600}{t_{discharge}} \quad (4)$$

Where  $C_g$  is the gravimetric capacitance ( $F\ g^{-1}$ ) of a single electrode in two-electrode cell. Furthermore,  $E_g$  ( $W\ h\ g^{-1}$ ) and  $P_g$  ( $W\ g^{-1}$ ) are the gravimetric energy density and gravimetric power density, respectively, based on the total active material in the cell.  $I$  is the current (A),  $m$  is the active mass of active material in a single electrode (g),  $\Delta V$  is the potential range, and  $t$  is the discharging time.

## 2. Figures

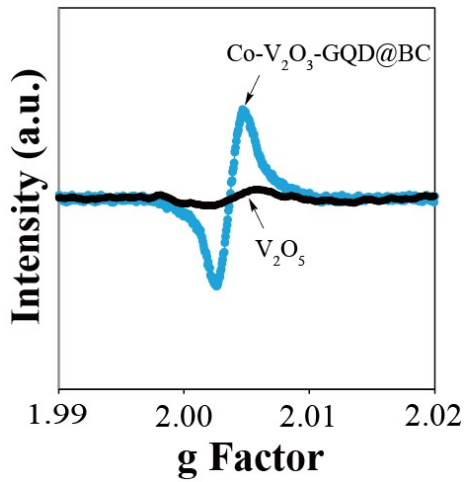

**Fig. s1** EPR spectra of  $V_2O_5$  and  $Co-V_2O_3-GQD@BC$

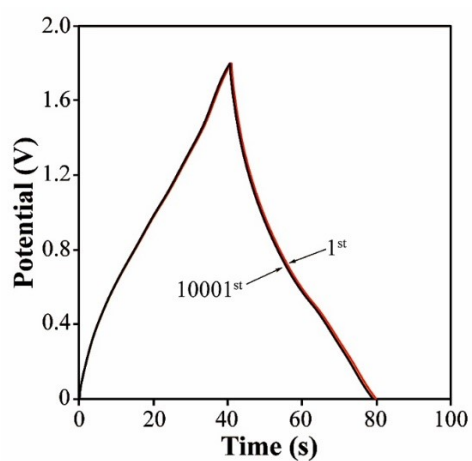

**Fig. s2** The charge-discharge curves at the current density of  $10 \text{ A g}^{-1}$  for 1<sup>st</sup> and 10001<sup>st</sup> cycle measurements

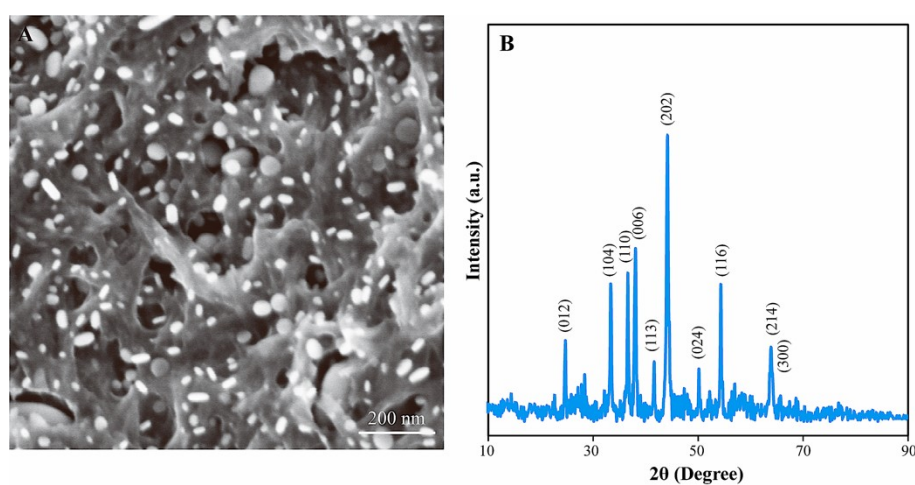

**Fig. s3** SEM image and XRD pattern of  $\text{Co-V}_2\text{O}_5\text{-GQD@BC}$  after 10000-cycle

### 3. Tables

**Table s1** EIS parameters of different electrodes

| Electrode                               | $R_S$ ( $\Omega$ ) | $R_{ct}$ ( $\Omega$ ) | $C_i$ (F)              | $Z_w$ ( $\Omega$ ) |
|-----------------------------------------|--------------------|-----------------------|------------------------|--------------------|
| $\text{V}_2\text{O}_3$                  | 6.084              | 133.9                 | $1.04 \times 10^{-4}$  | 0.002994           |
| $\text{V}_2\text{O}_3\text{-GQD}$       | 5.619              | 14.1                  | $9.388 \times 10^{-5}$ | 0.04668            |
| $\text{V}_2\text{O}_3\text{-GQD@BC}$    | 12.56              | 1.59                  | $1.239 \times 10^{-4}$ | 0.06678            |
| $\text{Co-V}_2\text{O}_3\text{-GQD@BC}$ | 6.193              | 1.234                 | $1.382 \times 10^{-4}$ | 0.04463            |
